# Supplementary material
Source: PubMed Central journal article supplement (PMC6904226)
Supplement: NIHMS1544209-supplement-1.pdf [file NIHMS1544209-supplement-1.pdf]

**Cell Reports, Volume 29**

## **Supplemental Information**

### **Polymorphic Immune Mechanisms**

#### **Regulate Commensal Repertoire**

**Aly A. Khan, Leonid Yurkovetskiy, Kelly O'Grady, Joseph M. Pickard, Renée de Pooter, Dionysios A. Antonopoulos, Tatyana Golovkina, and Alexander Chervonsky**

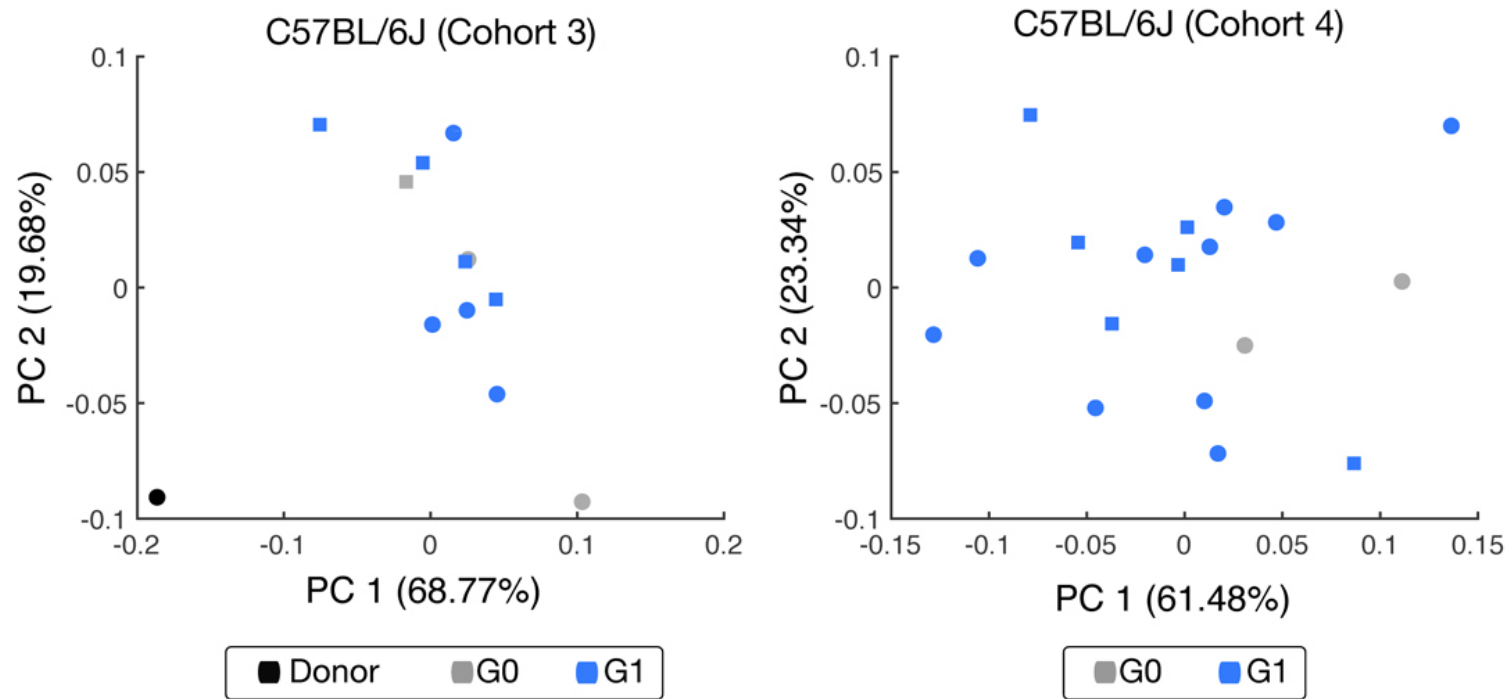

**Figure S1. PCA showing that G0 microbiomes are not separable from G1 in two independent experiments. Related to Figure 1.** Donor - B6 microbiota. Circles, females; squares, males.

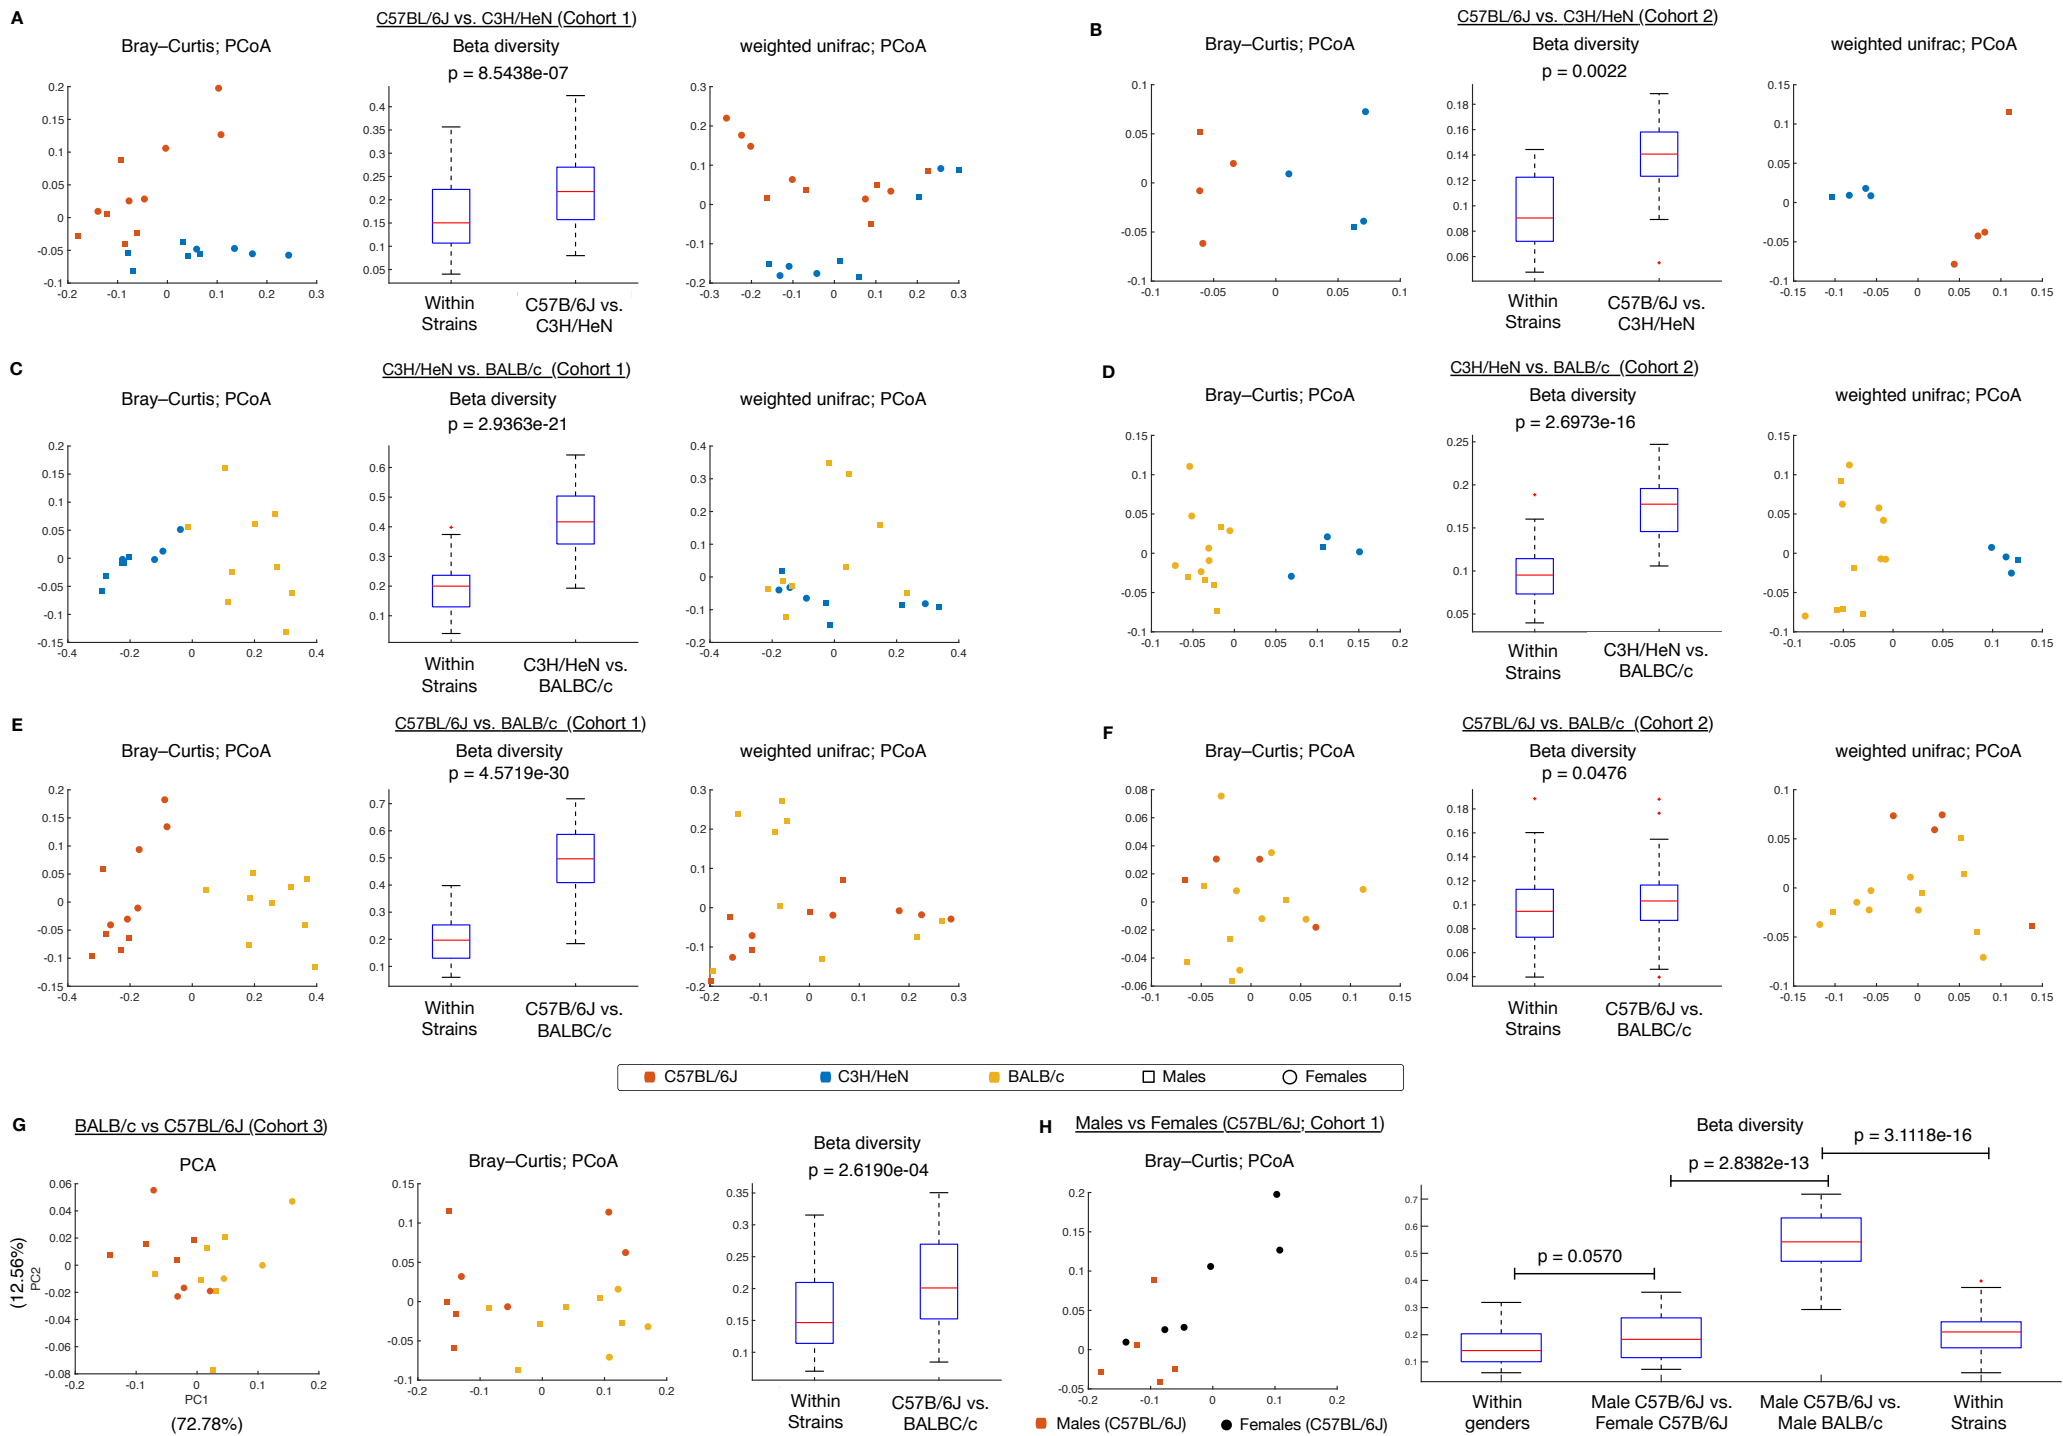

**Figure S2. Principal coordinate analysis (PCoA) and comparison of  $\beta$  diversity between various strains colonized with C57BL/6J microbiota. Related to Figure 2.**

**A-F.** PCoA was performed using Bray–Curtis distance (left) and Weighted UniFrac distance (right), demonstrating reproducible separation of strains using two different distance metrics; a non-phylogenetic based metric (Bray–Curtis) and a phylogenetic based metric (Weighted UniFrac).

One-sided non-parametric Wilcoxon rank sum test was used to determine if the  $\beta$  diversity estimated using Bray-Curtis distance metric between strains was greater than differences within a strain. The following comparisons are shown: C57BL/6J vs. C3H/HeN (Cohort 1) (**A**); C57BL/6J vs. C3H/HeN (Cohort 2)(**B**); C3H/HeN vs. BALB/c (Cohort 1) (**C**); C3H/HeN vs. BALB/c (Cohort 2) (**D**); C57BL/6J vs. BALB/c (Cohort 1) (**E**); C57BL/6J vs. BALB/c (Cohort 2) (**F**).

**G.** Comparison of the microbiomes of two ex-GF strains (BALB/c vs C57BL/6J) colonized with the same microbiotas from Cohort 3 shown as PCA (left), PCoA using Bray–Curtis distance (center), and  $\beta$  diversity estimated using Bray-Curtis distance metric between strains (right).

**H.** Comparison of the microbiomes of male and female ex-GF C57BL/6J mice from Cohort 1 shown as PCoA using Bray–Curtis distance. Males are represented by red rectangles, females by black circles (left). One-sided non-parametric Wilcoxon rank sum tests were used to examine if strain differences are greater than gender differences (right).  $\beta$  diversity found between male C57B/6J and female C57B/6J mice showed a strong trend for being greater than  $\beta$  diversity found within gender among C57B/6J mice ( $p = 0.0570$ ). The  $\beta$  diversity found between male C57B/6J and male BALB/c mice was significantly greater than  $\beta$  diversity found between male C57B/6J and female C57B/6J ( $p = 2.8382e-13$ ). The  $\beta$  diversity found between male C57B/6J and male BALB/c mice is significantly greater than  $\beta$  diversity found among male mice within strains ( $p = 3.1118e-16$ ).

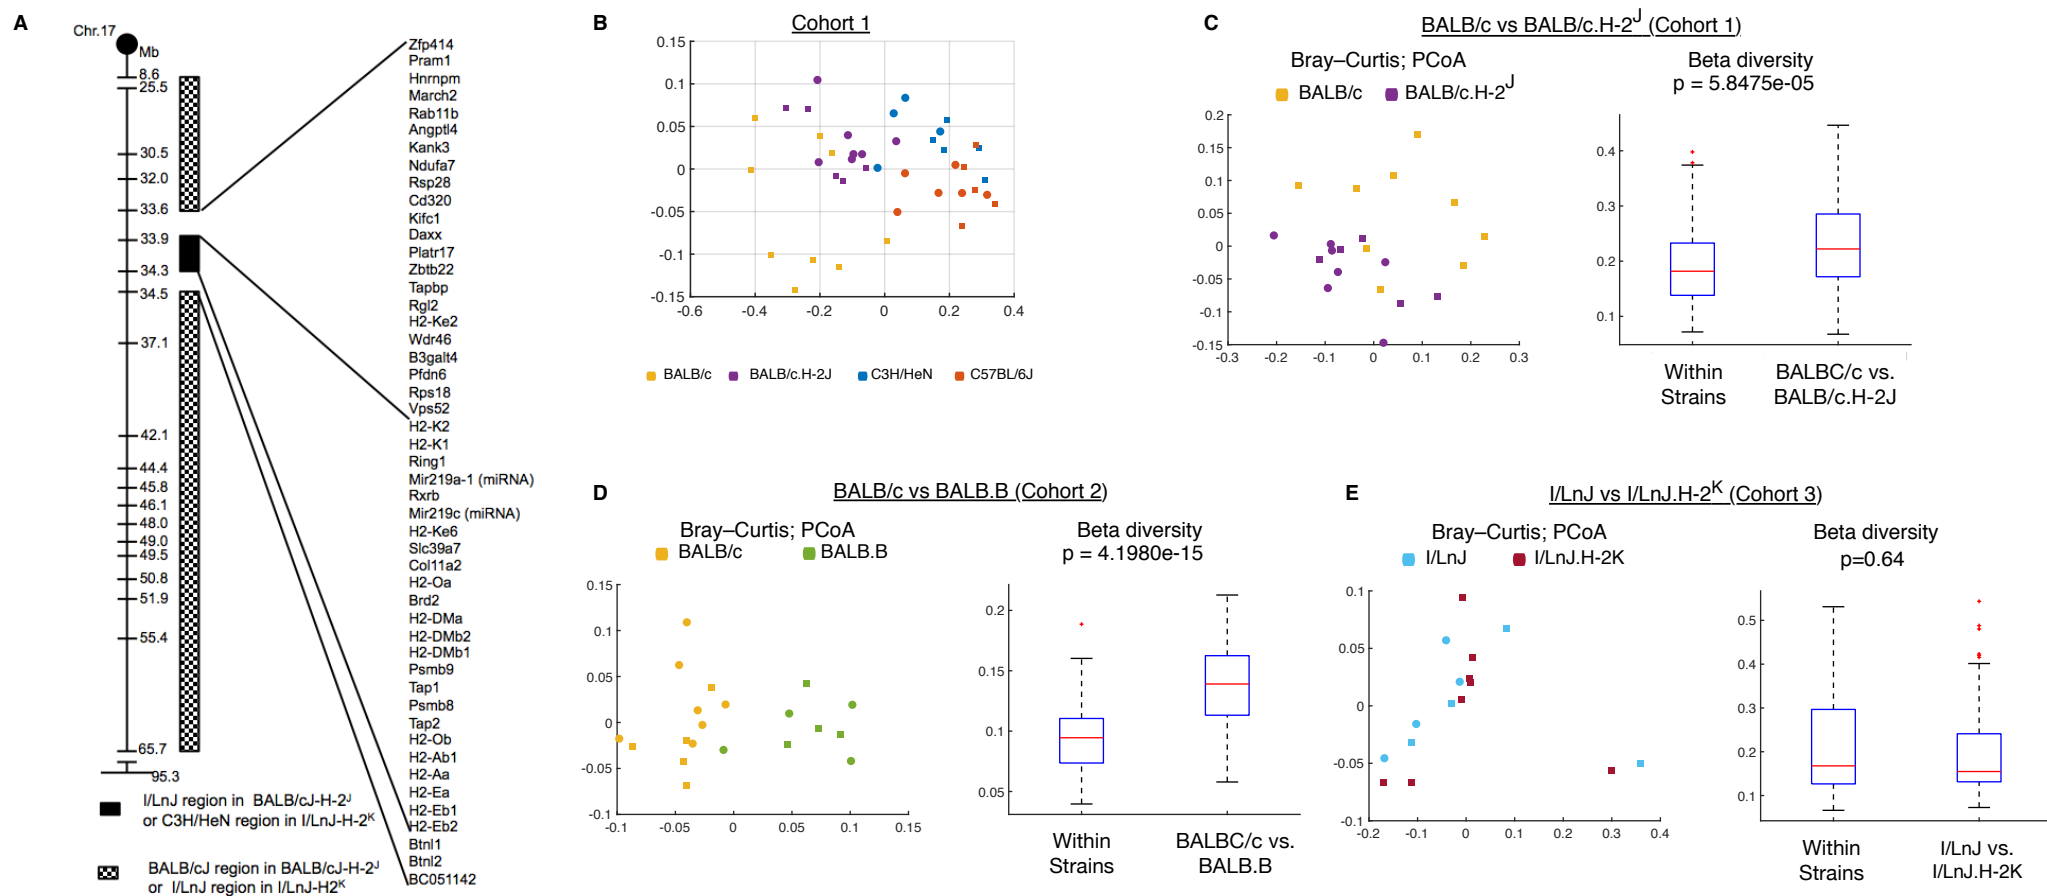

**Figure S3. Additional analyses of microbiomes of MHC-congenic strains of mice. Related to Figure 3.**

**A.** Schematic map of the congenic BALB/cJ line containing the MHC locus from I/LnJ mice and I/LnJ mice containing the MHC locus from C3H/HeN mice. The replacement was achieved by crossing the two strains followed by multiple back-crossings to BALB/cJ mice and I/LnJ mice respectively. At generation N10 mice in both back-crosses were intercrossed. Open areas upstream and downstream of the MHC locus - regions of undefined origin.

**B.** 2-D PCA analysis of the microbiomes of BALB/cJ (yellow), BALB/c-H-2j (magenta), C3H/HeN (blue) and C57BL/6J (red) mice. Dots – females, squares – males. 3-D plot of the same data analysis is shown in Figure 3A.

**C-E.** Principal coordinate analysis (PCoA) visualizations and comparison of  $\beta$  diversity between various strains colonized with C57BL/6J microbiota. PCoA performed using Bray-Curtis distance (left) and one-sided non-parametric Wilcoxon rank sum tests used to examine if strain differences are greater than gender differences (right): BALB/c vs BALB/c.H-2J (Cohort 1) (**C**); BALB/c vs BALB.B (Cohort 2) (**D**); I/LnJ vs I/LnJ.H-2K (Cohort 3) (**E**).

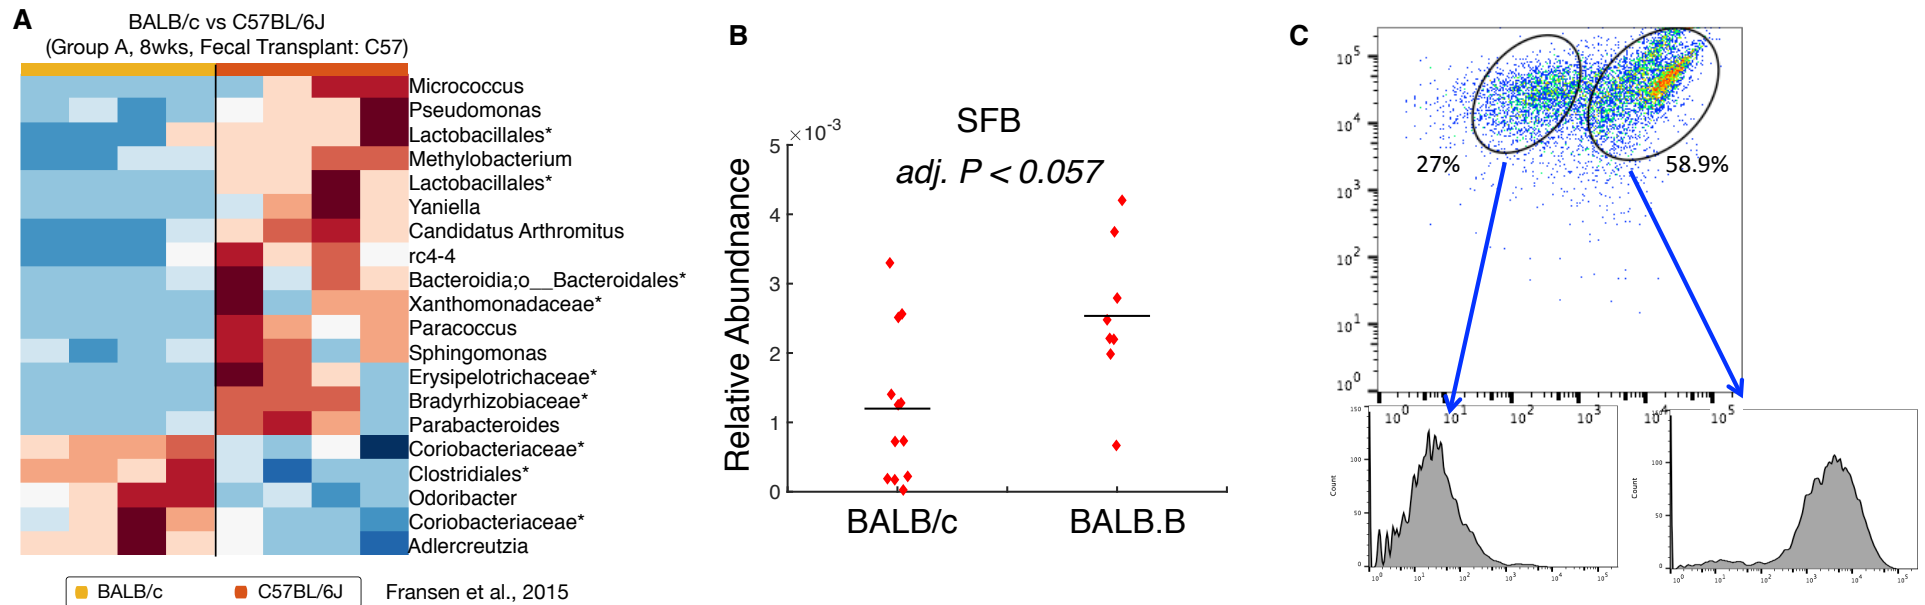

**Figure S4. Additional analyses of the microbiomes. Related to Figure 3**

**A.** Data from Fransen et al., 2015 reanalyzed. Heat map showing statistically significant lineage differences ( $P < .05$ , FDR adjusted t-test) of bacterial lineages between ex-GF BALB/c vs. C57BL/6J 8 weeks after fecal transplant with B6 microbiota. Notably, *Candidatus Arthromitus* (SFB) was higher in C57BL/6J.

**B.** Relative abundance of SFB bacteria in BALB/cJ (H-2<sup>d</sup>) and BALB.B (H-2<sup>b</sup>) mice from our high throughput sequencing experiment (Cohort 3).

**C.** An example of sorting of colonic bacteria for IgA-seq experiments. Colonic contents free of debris was stained with anti-IgA antibodies conjugated to the APC fluorochrome and sorted into + and - populations, which were reanalyzed before extracting DNA for sequencing.

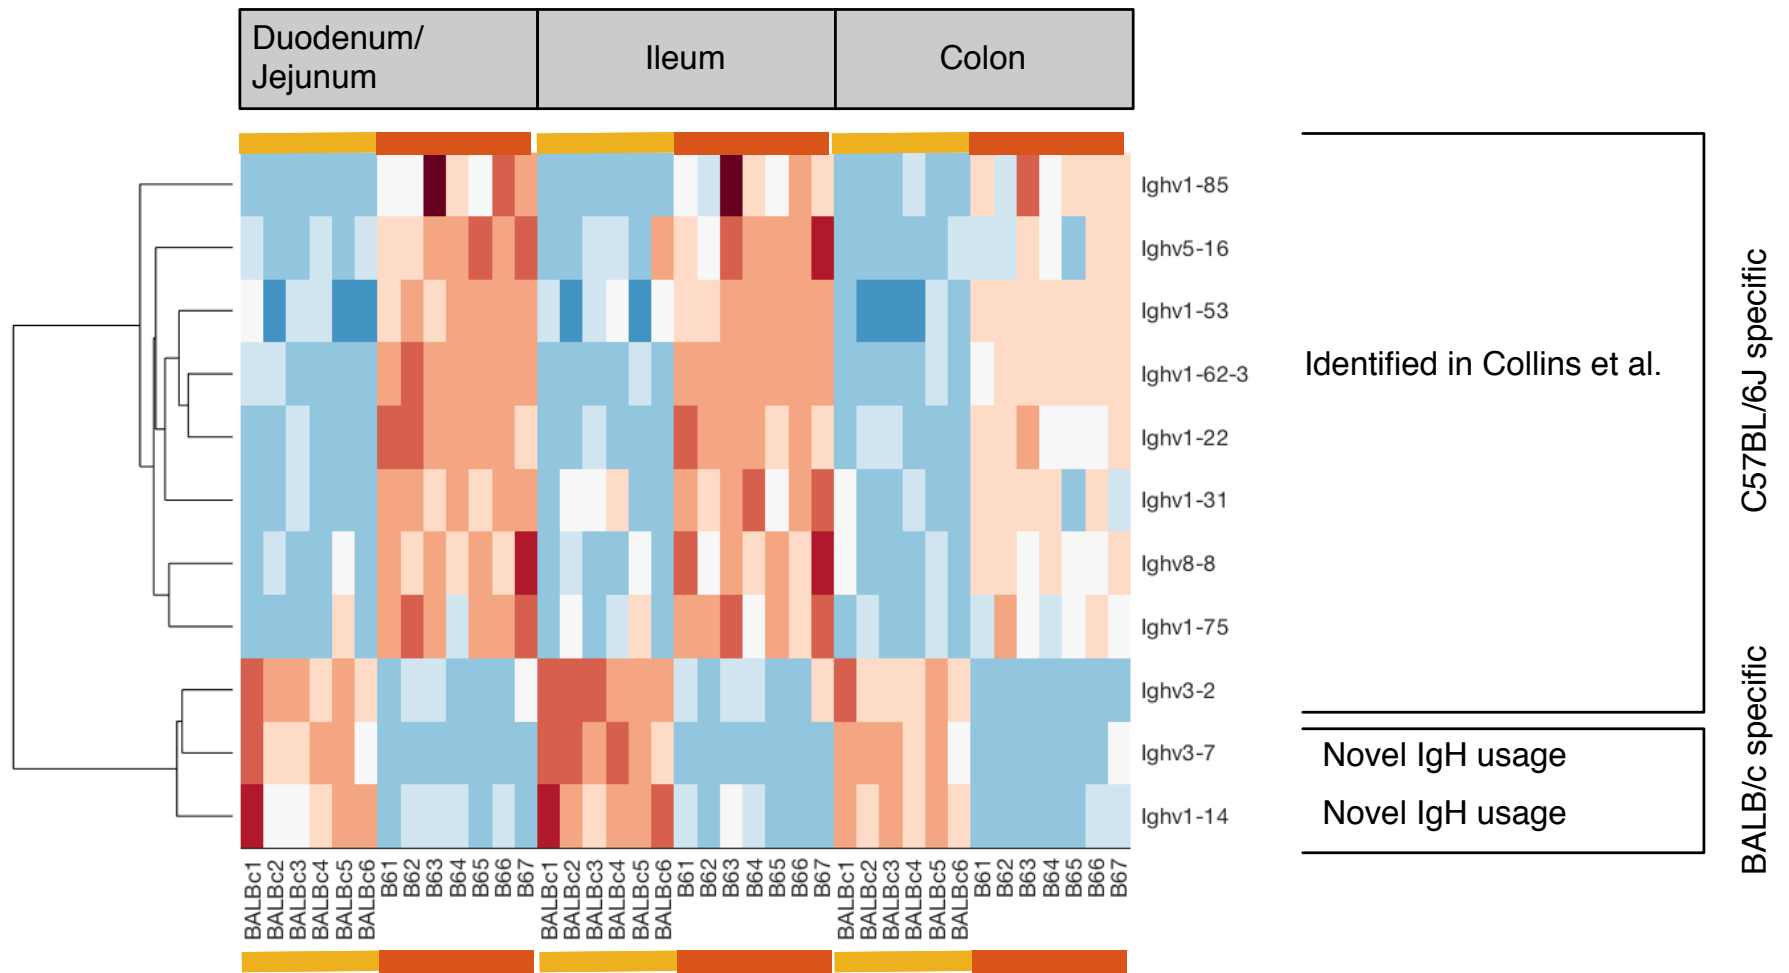

**Figure S5. BALB/cJ and C57BL/6J mice utilize different families of the variable regions of the heavy chain of immunoglobulins. Related to Figure 4.** Some of these differences were reported before (Collins et al, 2015), some are reported here.

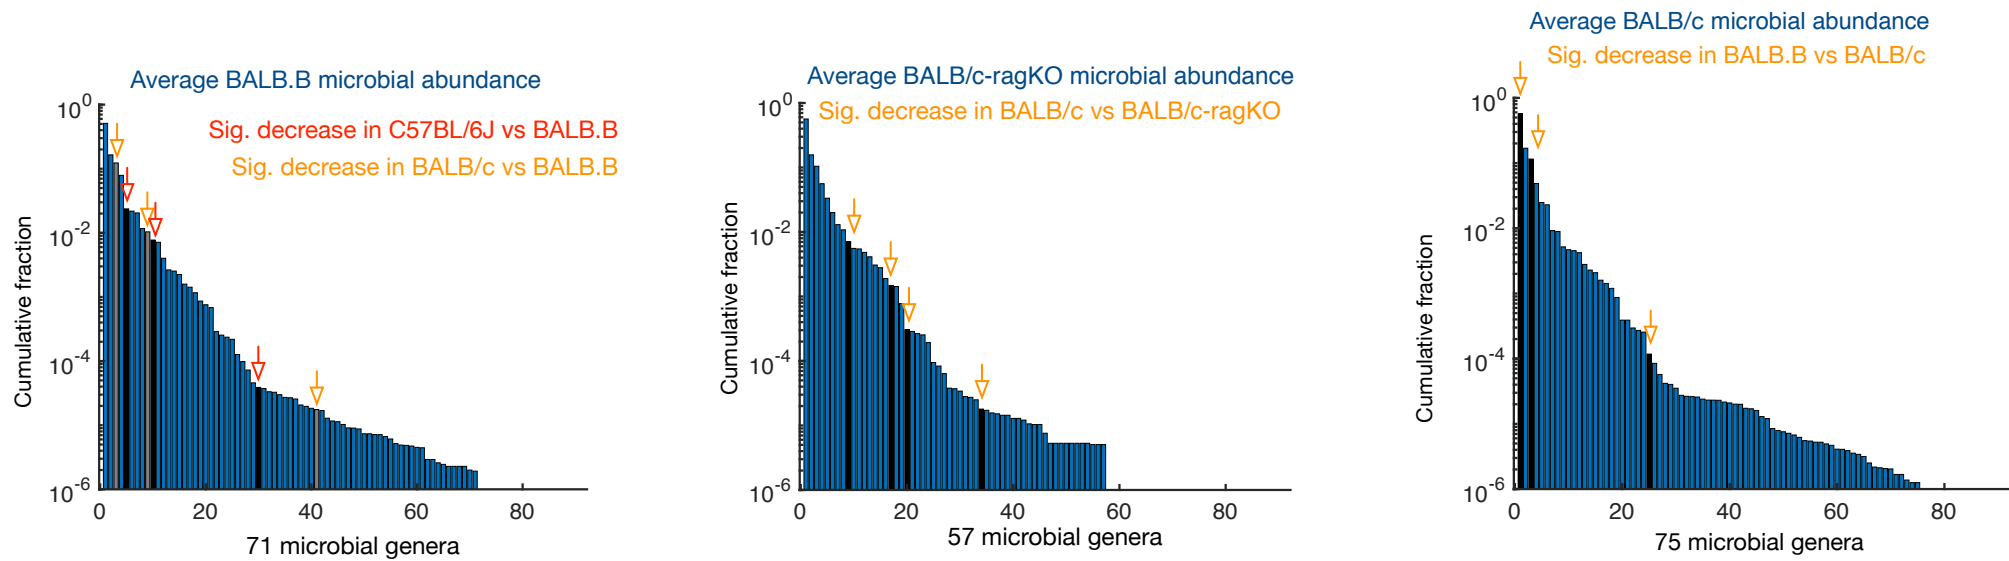

**Figure S6. Limited number of bacterial lineages is controlled by polymorphic innate and adaptive mechanisms. Related to Figure 3.** Arrows show abundances of bacterial lineages significantly different between indicated strains of mice. Abundance itself was not a factor for controlling mechanisms – lineages with higher and very low abundances were selectively controlled.



**Table S1. Input microbiota, cohort structure and mouse numbers in the current study. Related to Figures 1-4.**

| Cohort | Source of microbiota | G0 strains                  | G1 |   | Total number of mice per group per experiment |           |
|--------|----------------------|-----------------------------|----|---|-----------------------------------------------|-----------|
|        |                      |                             | F  | M |                                               |           |
| 1      | B6 UC (JAX)          | B6                          | 1F | 2 | 1                                             | <b>11</b> |
|        |                      | B6                          | 1F | 4 | 4                                             |           |
|        |                      | BALB/cJ                     | 1F | 0 | 10                                            | <b>10</b> |
|        |                      | BALB.H-2 <sup>l</sup>       | 1F | 7 | 5                                             | <b>12</b> |
|        |                      | C3H/HeN                     | 1F | 4 | 5                                             | <b>9</b>  |
| 2      | B6 TAC               | BALB/cJ Rag1 <sup>-/-</sup> | 1F | 1 | 2                                             | <b>5</b>  |
|        |                      | BALB/cJ Rag1 <sup>-/-</sup> | 1F | 1 | 1                                             |           |
|        |                      | C57BL/6J                    | 1F | 1 | 1                                             | <b>4</b>  |
|        |                      | C57BL/6J                    | 1F | 2 | 0                                             |           |
|        |                      | BALB.H-2 <sup>l</sup>       | 1F | 0 | 4                                             | <b>7</b>  |
|        |                      | BALB.H-2 <sup>l</sup>       | 1F | 3 | 0                                             |           |
|        |                      | BALB/cJ                     | 1F | 2 | 3                                             | <b>12</b> |
|        |                      | BALB/cJ                     | 1F | 5 | 2                                             |           |
|        |                      | I/LnJ                       | 1F | 1 | 2                                             | <b>12</b> |
|        |                      | I/LnJ                       | 1F | 1 | 4                                             |           |
|        |                      | I/LnJ                       | 1F | 2 | 2                                             |           |
|        |                      | C3H/HeN                     | 1F | 1 | 1                                             | <b>4</b>  |
|        |                      | C3H/HeN                     | 1F | 2 | 0                                             |           |
|        |                      | BALB.H-2 <sup>b</sup>       | 1F | 2 | 2                                             | <b>8</b>  |
|        |                      | BALB.H-2 <sup>b</sup>       | 1F | 2 | 2                                             |           |
| 3      | B6 TAC               | I/LnJ.H-2 <sup>k</sup>      | 1F | 0 | 4                                             | <b>8</b>  |
|        |                      | I/LnJ.H-2 <sup>k</sup>      | 1F | 0 | 4                                             |           |
|        |                      | BALB/cJ                     | 1F | 2 | 4                                             | <b>10</b> |

|   |        |         |    |   |   |           |
|---|--------|---------|----|---|---|-----------|
|   |        | BALB/cJ | 1F | 1 | 3 |           |
|   |        | I/LnJ   | 1F | 2 | 3 | <b>8</b>  |
|   |        | I/LnJ   | 1F | 2 | 1 |           |
|   |        | B6      | 1F | 2 | 2 | <b>8</b>  |
|   |        | B6      | 1F | 2 | 2 |           |
| 4 | B6 JAX | B6      | 1F | 3 | 2 | <b>16</b> |
|   |        | B6      | 1F | 2 | 2 |           |
|   |        | B6      | 1F | 5 | 2 |           |

Sources of microbiota for GF mice repopulation: Cohort 1 - B6 (UC) JAX originated from The Jackson Laboratory, but were bred and housed at the University of Chicago for several generations; Cohorts 2 and 3 – donors arrived straight from Taconic; B6 JAX – donors arrived straight from The Jackson Laboratory.

Each line shows the size and gender break of the progeny of a particular G0 female.

**Last column summarizes mouse numbers used for statistical analysis in each experiment (cohort).**

**Table S2. Selected genes with differential expression in BALB/c and B6 gut chosen by relevant gene ontology (GO) category and relevance to immunity and/or inflammatory conditions in the gut. Related to Figure 4.**

| Physiological function<br>Gene name                                                                                        | GO ID                             | GO process association                                                                 | Association with immunity and disease                                   | References                                                                    |
|----------------------------------------------------------------------------------------------------------------------------|-----------------------------------|----------------------------------------------------------------------------------------|-------------------------------------------------------------------------|-------------------------------------------------------------------------------|
| Complement activation<br><i>C1rb</i><br><i>C1s2</i>                                                                        | 0006956<br>0006956                | Complement activation<br>Complement activation                                         |                                                                         |                                                                               |
| Mucosal pentraxins<br><i>Mptx1</i><br><i>Mptx2</i>                                                                         |                                   |                                                                                        | Microbial dysbiosis<br>Antimicrobial peptide expressing<br>Paneth cells | (van der Meer-<br>van Kraaij et al.,<br>2007)<br>(Haber et al.,<br>2017)      |
| Inactivators of xenobiotics and toxins<br><i>Ces1b</i><br><i>Fmo4</i><br><br><i>Gsta1</i>                                  | 0016042<br>0055114<br><br>0006749 | Lipid catabolic process<br>TMAO inactivation<br><br>Glutathione metabolism             | Enzymatic hydrolysis<br>Gut microbiota cardio-vascular<br>disease       | (Hosokawa,<br>2008)<br>(Wang et al.,<br>2011)                                 |
| NK cell differentiation and activation<br><i>H60c</i><br><i>Il11ra2</i><br><i>Raet1e</i>                                   | 0001913<br>0004896<br>0001913     | Cell mediated cytotoxicity<br>Cytokine receptor activity<br>Cell mediated cytotoxicity |                                                                         |                                                                               |
| Glycosyltransferases<br><i>St3gal4</i>                                                                                     | 0006486                           | Protein glycosylation                                                                  | Intestinal inflammation and<br>microbial dysbiosis                      | (Huang et al.,<br>2015)                                                       |
| Trim proteins – regulators of<br>inflammation and anti-viral immunity<br><i>Trim30d</i><br><i>Trim34b</i><br><i>Trim80</i> |                                   |                                                                                        | Innate immunity and pathogen<br>recognition                             | (Ozato et al.,<br>2008)<br>(Ozato et al.,<br>2008)<br>(Ozato et al.,<br>2008) |
| Gasdermins<br><i>Gsdmc3</i><br><i>Gsdms4</i>                                                                               | 0012501<br>0012501                | Programmed cell death<br>Programmed cell death                                         | Inflammatory bowel disease<br>Inflammatory bowel disease                | (Yuan et al.,<br>2018)<br>(Yuan et al.,<br>2018)                              |

|                                                                                                                          |                               |                                                                                                                                     |                                                                                                      |                                               |
|--------------------------------------------------------------------------------------------------------------------------|-------------------------------|-------------------------------------------------------------------------------------------------------------------------------------|------------------------------------------------------------------------------------------------------|-----------------------------------------------|
| Reactive oxygen species production/Oxidation of microbial metabolites<br><i>Duox1</i>                                    | 0019221                       | Cytokine-mediated signaling pathway                                                                                                 | Gastric colonization by <i>H. Felis</i>                                                              | (Grasberger et al., 2013)                     |
| Neutrophil function<br><i>Prg2</i><br><i>Padi4</i><br><i>Tmem116</i>                                                     | 0002376<br>0002376            | Immune system process<br>Immune system process                                                                                      | Crohn's disease<br>Septic shock mortality                                                            | (Han et al., 2013)<br>(Costa et al., 2018)    |
| Intestinal barrier function<br><i>Afm</i><br><i>Tjap1</i><br><i>Pianp</i>                                                | 0008431<br>0005923<br>0050776 | Vitamin E binding<br>Bicellular tight junction                                                                                      | Intestinal homeostasis                                                                               | (Mihara et al., 2016)                         |
| Peptidase inhibitors<br><i>Serpina10</i><br><i>Serpina1a</i><br><i>Serpina1b</i><br><i>Serpina3a</i><br><i>Serpina3h</i> | 0010466<br>0010466<br>0010466 | Negative regulation of peptidase activity<br>Negative regulation of peptidase activity<br>Negative regulation of peptidase activity |                                                                                                      |                                               |
| Interferon-induced genes<br><i>Iff44l</i><br><i>Iff202b</i><br><i>Gvin1</i>                                              | 0006955<br>0045087            | Immune response<br>Innate immune response                                                                                           | Microbial diversity correlated with expression of these genes<br>Immunity to intracellular pathogens | (Brodziak et al., 2013)<br>(MacMicking, 2004) |
| Inflammasome regulation<br><i>Nlrp1b</i>                                                                                 | 0045087                       | Innate immune response                                                                                                              | Colitis                                                                                              | (Williams et al., 2015)                       |
| Macrophage phagocytic function<br><i>Spp1</i>                                                                            | 0006954                       | Inflammatory response                                                                                                               |                                                                                                      | (Toyonaga et al., 2015)                       |
| Metabolic genes<br><i>Eno1b</i> (retrotransposed)                                                                        |                               |                                                                                                                                     | <i>H. Pylori</i> -mediated gastric diseases                                                          | (Chen et al., 2014)                           |

**Table S3. Complete list of genes with significant difference in expression between BALB/c and B6 gut. Related to Fig.4.** Variable regions of immunoglobulin genes are shown separately. DJ-duodenum/jejunum.

| Duodenum/Jejunum | Host Genes      |                       | Immunoglobulin Genes |            |            |
|------------------|-----------------|-----------------------|----------------------|------------|------------|
|                  | Ileum           | Colon                 | IG-DJ                | IG-Ileum   | IG-Colon   |
| 1700011H14Rik    | 1700011H14Rik   | 2010005H15Rik         | Ighv1-14             | Ighv1-13   | Ighv1-14   |
| 2200002J24Rik    | 2200002J24Rik   | 5830417110Rik         | Ighv1-15             | Ighv1-14   | Ighv1-15   |
| 5830417110Rik    | 5830417110Rik   | 9530053A07Rik         | Ighv1-22             | Ighv1-15   | Ighv1-2    |
| 9530053A07Rik    | 9530053A07Rik   | Actc1                 | Ighv1-31             | Ighv1-22   | Ighv1-20   |
| Acta1            | A930018M24Rik   | Afm                   | Ighv1-39             | Ighv1-23   | Ighv1-22   |
| Actc1            | Acta1           | AK157302              | Ighv1-53             | Ighv1-27   | Ighv1-23   |
| AK157302         | Actc1           | Apoa2                 | Ighv1-56             | Ighv1-31   | Ighv1-25   |
| BC035947         | AK157302        | Atp8b5                | Ighv1-58             | Ighv1-36   | Ighv1-27   |
| Camk2b           | Akt2-ps         | BC025446              | Ighv1-62             | Ighv1-38   | Ighv1-30   |
| Clec2j           | Apoa2           | C1rb                  | Ighv1-62-2           | Ighv1-43   | Ighv1-31   |
| Cyp2c29          | BC035947        | C1s2                  | Ighv1-62-3           | Ighv1-53   | Ighv1-33   |
| Cyp2c67          | C1rb            | Cib3                  | Ighv1-71             | Ighv1-58   | Ighv1-36   |
| Cyp3a59          | C1s2            | Col4a6                | Ighv1-75             | Ighv1-62   | Ighv1-37   |
| Defa-ps18        | Ces1b           | Cyp2c67               | Ighv1-76             | Ighv1-62-2 | Ighv1-43   |
| Defa2            | Clec2j          | Cyp2r1                | Ighv1-78             | Ighv1-62-3 | Ighv1-53   |
| Defa20           | Col4a6          | Dynlt1a               | Ighv1-81             | Ighv1-71   | Ighv1-62-3 |
| Defa21           | Cyp2c67         | Ear-ps3               | Ighv1-84             | Ighv1-75   | Ighv1-67   |
| Defa22           | Cyp3a44         | Eno1b                 | Ighv1-85             | Ighv1-84   | Ighv1-75   |
| Defa26           | Defa-ps18       | ENSMUST00000012440.12 | Ighv10-3             | Ighv1-85   | Ighv1-81   |
| Defa27           | Defa-ps5        | ENSMUST000000160663.1 | Ighv14-4             | Ighv1-86   | Ighv1-83   |
| Defa28           | Defa-ps8        | Fmo4                  | Ighv2-9              | Ighv2-9    | Ighv1-85   |
| Defa32           | Defa2           | Gbp10                 | Ighv3-1              | Ighv3-1    | Ighv1-86   |
| Defa33           | Defa20          | Gbp2b                 | Ighv3-2              | Ighv3-2    | Ighv14-4   |
| Defa35           | Defa21          | Gvin1                 | Ighv3-7              | Ighv3-7    | Ighv2-4    |
| Dynlt1a          | Defa22          | H2-Ea-ps              | Ighv5-16             | Ighv4-2    | Ighv2-6    |
| Eno1b            | Defa26          | H2-Q3                 | Ighv7-2              | Ighv5-16   | Ighv2-6-8  |
| ENSMUST000000116 |                 |                       |                      |            |            |
| 434.9            | Defa27          | H60c                  | Ighv8-8              | Ighv7-2    | Ighv2-9    |
| Gsdmc3           | Defa28          | Hist1h2aa             | Igkv1-99             | Ighv8-11   | Ighv3-1    |
| Gsdmc4           | Defa32          | Hist1h2ao             | Igkv4-62             | Ighv8-8    | Ighv3-2    |
| Gvin1            | Defa33          | Hmga1-rs1             |                      | Igkv7-33   | Ighv3-7    |
| H2-Ea-ps         | Duox1           | I830127L07Rik         |                      | Igkv8-31   | Ighv4-2    |
| H2-K2            | Dynlt1a         | Ifi202b               |                      |            | Ighv5-16   |
| Hist1h2aa        | Eno1b           | Ifi44l                |                      |            | Ighv5-2    |
|                  | ENSMUST00000001 |                       |                      |            |            |
| Hist3h2bb-ps     | 2440.12         | Ii11ra2               |                      |            | Ighv6-6    |
|                  | ENSMUST00000009 |                       |                      |            |            |
| Hmga1-rs1        | 0860.6          | Klk15                 |                      |            | Ighv6-7    |
| Hmgb1-ps8        | Gsdmc4          | Lrmda                 |                      |            | Ighv7-2    |
| Ifi202b          | Gsdmcl2         | Marcksl1-ps4          |                      |            | Ighv7-4    |
| Ifi44l           | Gsta1           | Mptx2                 |                      |            | Ighv8-11   |
| Itpa-ps1         | Gvin1           | Mrpl48-ps             |                      |            | Ighv8-2    |
| Mcoln3           | H2-Ea-ps        | Mrto4-ps2             |                      |            | Ighv8-8    |

|            |               |            |          |
|------------|---------------|------------|----------|
| Mptx1      | H2-Q3         | Mup-ps23   | Igkv1-88 |
| Mrpl48-ps  | Hist1h2aa     | Nlrp1b     | Igkv3-2  |
| Msantd1    | Hist1h2ao     | Nxpe4      | Igkv4-50 |
| Nlrp1b     | Hist2h2aa2    | Nxpe5      | Igkv4-79 |
| Nlrp1c-ps  | Hmga1-rs1     | Oas2       | Igkv4-92 |
| Pnp2       | Hmgb1-ps8     | Padi4      | Igkv7-33 |
| Prg2       | I830127L07Rik | Pkhd1      |          |
| Rbpsuh-rs3 | Ifi202b       | Pnp2       |          |
| Rpl15-ps1  | Ifi44l        | Raet1e     |          |
| Rpl3-ps1   | Il11ra2       | Rbpsuh-rs3 |          |
| Rplp0-ps1  | Insl3         | Rpl3-ps1   |          |
| Rps12-ps9  | Mptx1         | Rpl35a-ps2 |          |
| Rps3a2     | Mrpl48-ps     | Rpl35a-ps3 |          |
| Serpina3a  | Nlrp1b        | Rpl35a-ps4 |          |
| Skiv2l-ps1 | Nlrp1c-ps     | Rpl35a-ps6 |          |
| Sprr2a1    | Nr0b2         | Rpl36-ps2  |          |
| Sspo       | Nudc-ps1      | Rplp0-ps1  |          |
| St3gal4    | Pianp         | Rps12-ps9  |          |
| Sycp1      | Pik3c2g       | Rps3a2     |          |
| Tdg-ps     | Pnp2          | Serpina1a  |          |
| Them7      | Rbpsuh-rs3    | Serpina1b  |          |
| Tjap1      | Rpl3-ps1      | Skiv2l-ps1 |          |
| Tmem116    | Rpl35a-ps2    | Slc22a29   |          |
| Tpm3-rs7   | Rpl35a-ps3    | Sycp1      |          |
| Trbv29     | Rpl35a-ps4    | Tdg-ps     |          |
| Trim34b    | Rpl35a-ps6    | Tdpx-ps1   |          |
| Trim80     | Rplp0-ps1     | Tpm3-rs7   |          |
| Vmn1r212   | Rps12-ps9     | Trim30c    |          |
| Wsb2-ps    | Rps2-ps6      | Trim30d    |          |
|            | Rps3a2        | Trim34b    |          |
|            | Serpina10     | Unc5a      |          |
|            | Serpina3h     | Wsb2-ps    |          |
|            | Sh2d6         |            |          |
|            | Sh2d7         |            |          |
|            | Skiv2l-ps1    |            |          |
|            | Spp1          |            |          |
|            | Sprr2a1       |            |          |
|            | Sspo          |            |          |
|            | St3gal4       |            |          |
|            | Sycp1         |            |          |
|            | Tdg-ps        |            |          |
|            | Tdpx-ps1      |            |          |
|            | Them7         |            |          |
|            | Tjap1         |            |          |
|            | Tmem116       |            |          |
|            | Tpm3-rs7      |            |          |
|            | Trbv29        |            |          |

Trim34b

Trim80

Wsb2-ps
